# Supplementary material for: Modifying an ultrathin insulating layer to suppress lithium dendrite formation within garnet solid electrolytes
Source: Royal Society of Chemistry journal article supplement (doi:10.1039/d0ta11311e), 2020-12-22
Supplement: d0ta11311e1.pdf [file d0ta11311e1.pdf]

## Supporting Information

### **Modifying an ultrathin insulating layer to suppress lithium dendrite formation within garnet solid electrolytes**

Shijun Tang,<sup>†a</sup> Guiwei Chen,<sup>†a</sup> Fucheng Ren,<sup>a</sup> Hongchun Wang,<sup>a</sup> Wu Yang,<sup>a</sup> Chenxi Zheng,<sup>a</sup>  
Zhengliang Gong<sup>\*a</sup> and Yong Yang<sup>\*ab</sup>

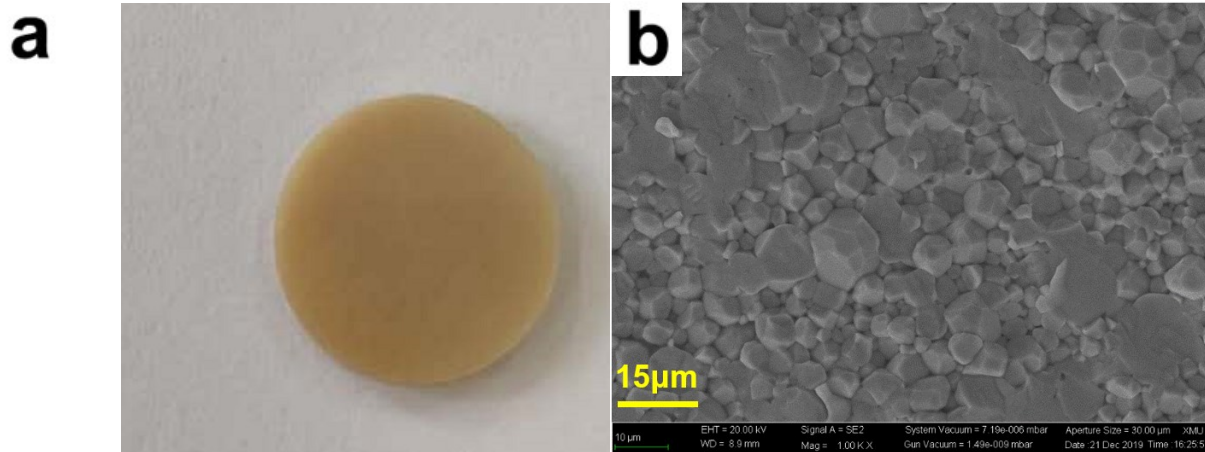

**Figure S1.** (a) Digital photograph of LLZTO pellet. (b) Cross sectional SEM image of LLZTO pellet.

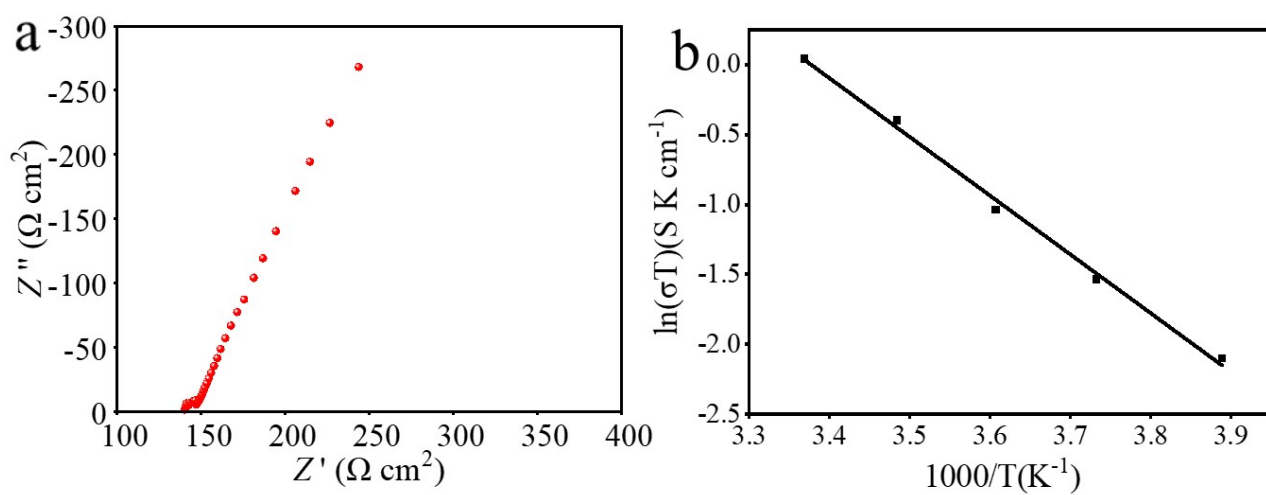

**Figure S2.** (a) Nyquist plots of LLZTO solid state electrolyte pellet measured at room temperature (surface area = 0.865 cm<sup>2</sup>, thickness = 0.8 mm). (b) Arrhenius plot of the ionic conductivity of LLZTO.

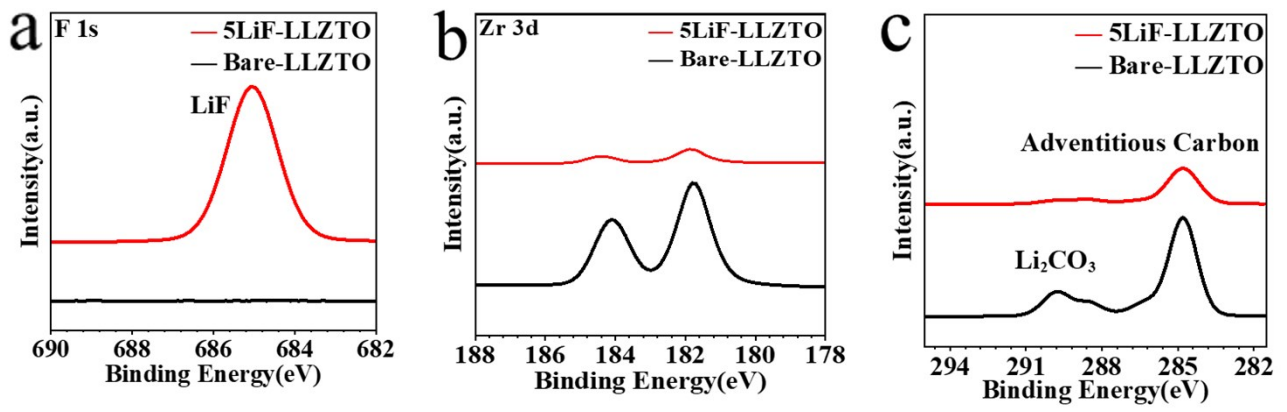

Figure S3. XPS results of pristine LLZTO and 5LF-LLZTO.

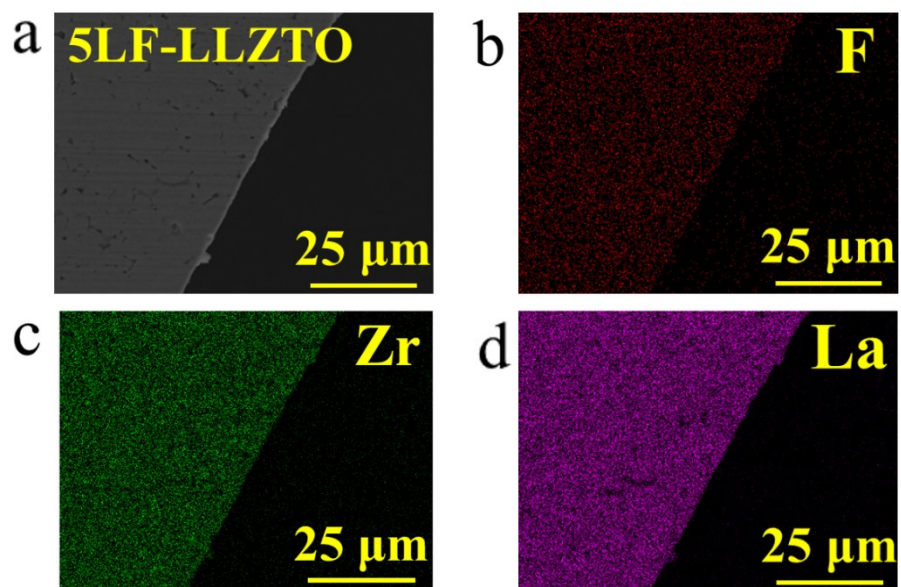

**Figure S4.** Top-view SEM image of 5LF-LLZTO pellets and corresponding EDS mapping images.

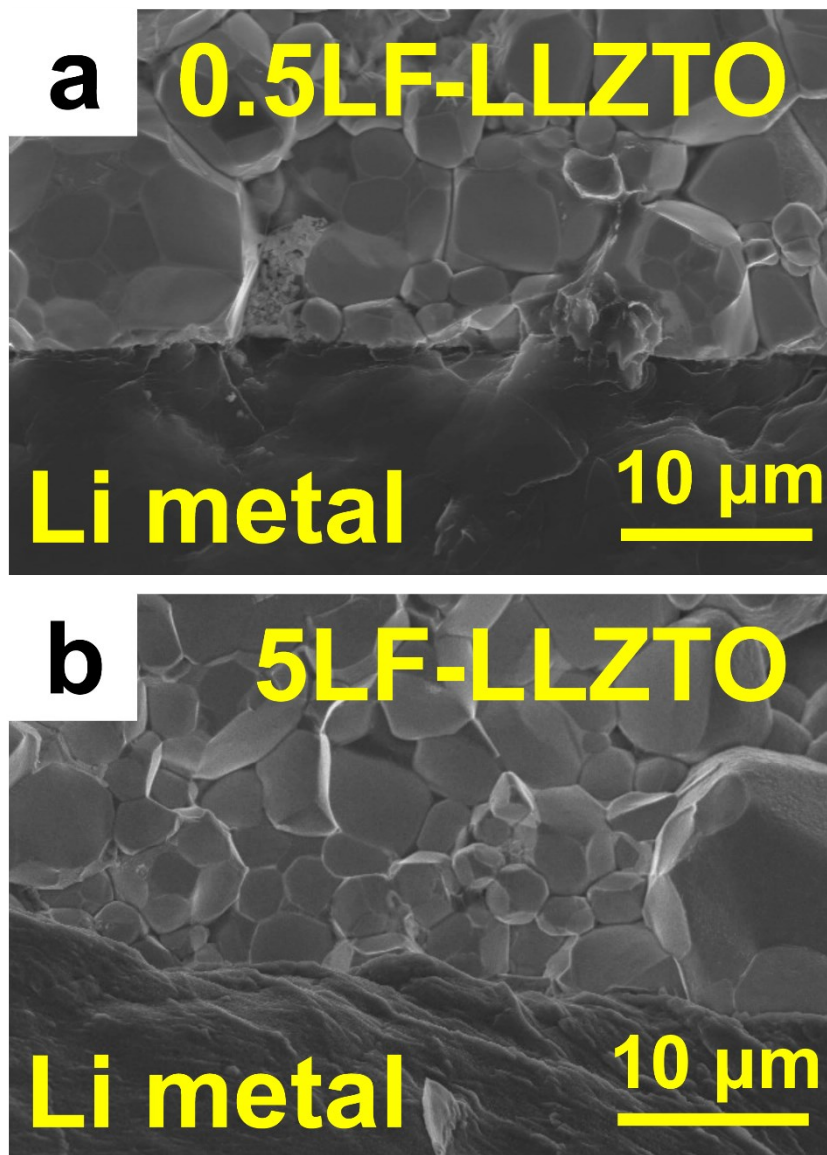

**Figure S5.** Interface SEM images of the LiF-coated LLZTO electrolytes with metallic Li before Li plating/stripping. (a) 0.5LF|LLZTO and (b) 5LF-LLZTO.

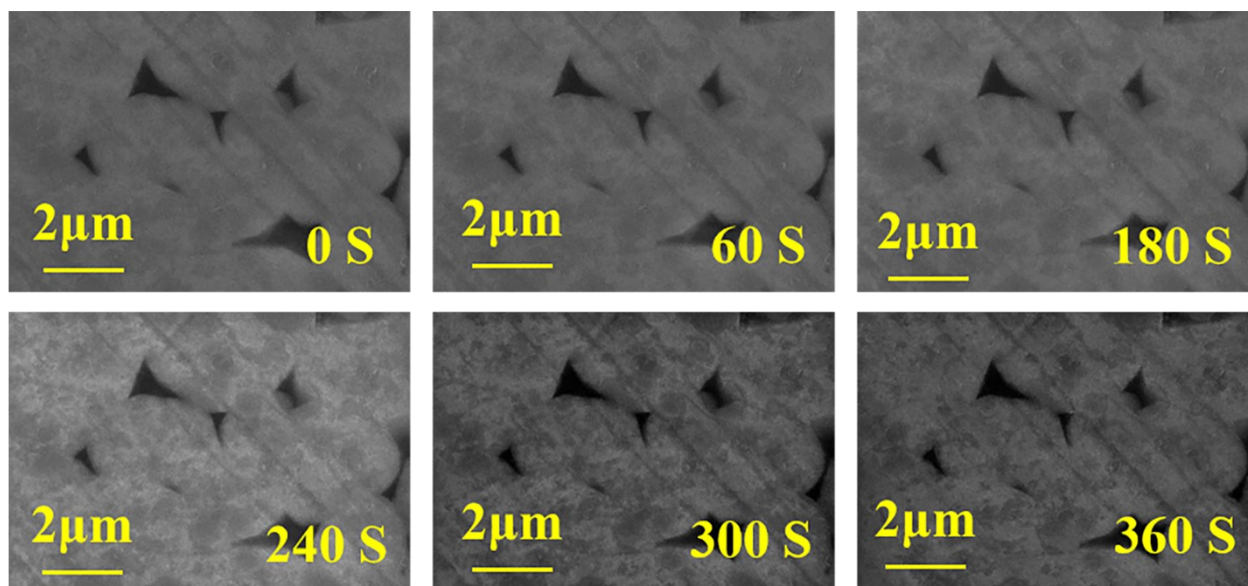

**Figure S6.** Lithium expulsion behaviors recorded under continuous frame scan at 5LF-LLZTO pellet surface.

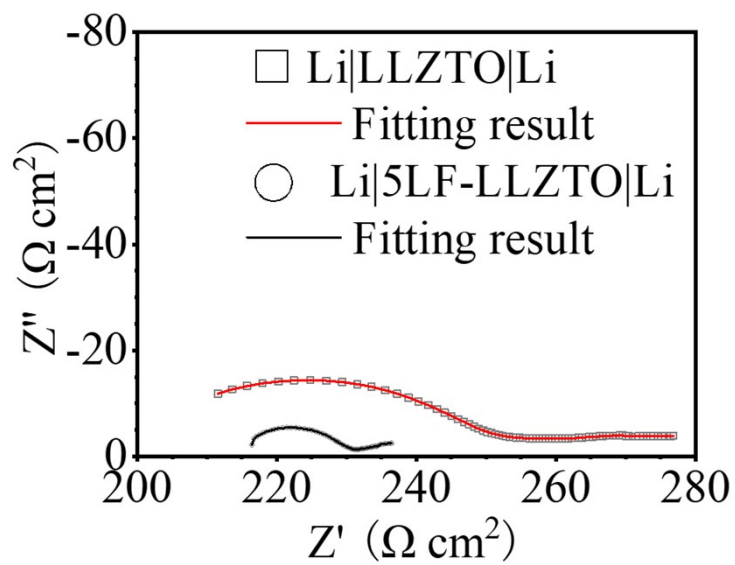

**Figure S7.** Comparison of EIS profiles of  $\text{Li}|\text{LLZTO}|\text{Li}$  and  $\text{Li}|\text{5LF-LLZTO}|\text{Li}$  symmetric cells.



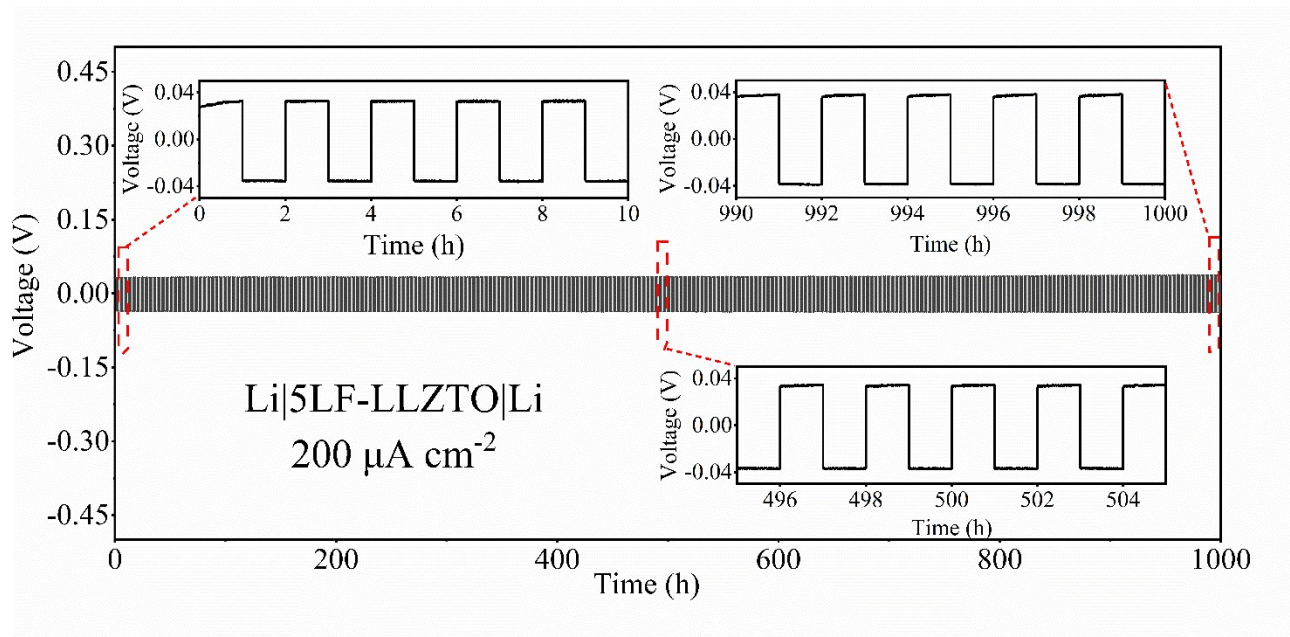

**Figure S8.** Galvanostatic cycling performance of Li|5LF-LLZTO|Li symmetric cell.

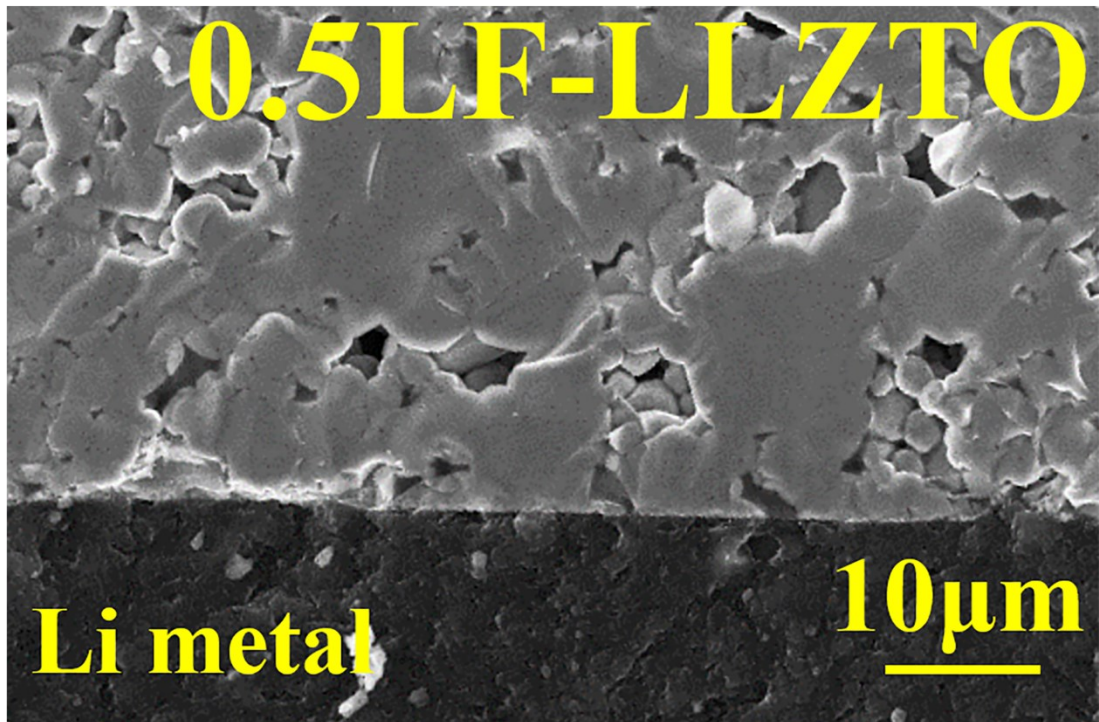

F

**figure S9.** Cross-section SEM image of the Li/0.5LF-LLZTO interface after Li plating/stripping for 1500 h.

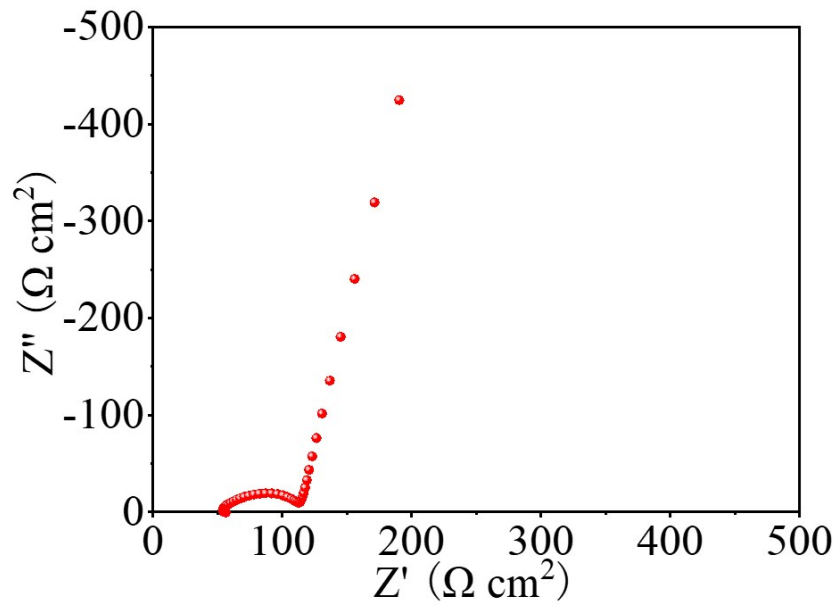

**Figure S10.** EIS plot of the Li|0.5LF-LLZTO|LiCoO<sub>2</sub> hybrid solid-state full cell with toothpaste-like cathode before cycling at 60°C.

**Table S1.** Comparison of electrochemical performances by different modification on garnet solid state electrolytes.

| Surface modification materials | Methods                       | Interfacial resistance ( $\Omega\cdot\text{cm}^2$ ) | Cycling performance ( $\text{mA}\cdot\text{cm}^{-2}/\text{hours}$ ) | Temperature | Ref.      |
|--------------------------------|-------------------------------|-----------------------------------------------------|---------------------------------------------------------------------|-------------|-----------|
| Carbon                         | Thermal reduction             | 45                                                  | 0.1/450                                                             | 65°C        | 1         |
| Al                             | Ebeam evaporator              | 75                                                  | 0.1/40<br>0.2/41                                                    | 20°C        | 2         |
| Graphite                       | Drawing                       | 105                                                 | 0.3/1000                                                            | RT          | 3         |
| Ag                             | Magnetron Sputtering          | 66                                                  | 0.1/100<br>0.2/100                                                  | RT          | 4         |
| Al <sub>2</sub> O <sub>3</sub> | ALD                           | 1                                                   | 0.2/90                                                              | 25°C        | 5         |
| SnO <sub>2</sub>               | Magnetron sputtering          | 25                                                  | 0.2/650                                                             | RT          | 6         |
| MoS <sub>2</sub>               | Polishing                     | 14                                                  | 0.2/40                                                              | 100°C       | 7         |
| HCl                            | Acid treatment                | 26                                                  | 0.2/700                                                             | 30°C        | 8         |
| Candle soot                    | Flame vapor deposition        | 50                                                  | 0.1/450                                                             | 60°C        | 9         |
| Cu <sub>3</sub> N              | Magnetron sputtering          | 83.4                                                | 0.1/1000                                                            | RT          | 10        |
| LiF                            | Vacuum evaporation deposition | 12.7                                                | 0.2/1500<br>0.4/300                                                 | RT          | This work |

**Table S2.** Lattice parameters of cubic lithium, LiF, and LLZO obtained from first-principle calculation.

|                    | <b>Li</b>    | <b>LiF</b>   | <b>LLZO</b>               |
|--------------------|--------------|--------------|---------------------------|
| <b>Space group</b> | <i>Fm-3m</i> | <i>Fm-3m</i> | <i>I4<sub>1</sub>/acd</i> |
| <b><i>a</i>(Å)</b> | 4.404        | 4.083        | 13.069                    |

**Table S3.** Lattice parameters, interfacial work of adhesion and contact angle of Li/LiF and Li/LLZO interface obtained from first-principle calculation.

| <b>Interface</b>                            | <b>Li/LiF</b> | <b>Li/LLZO</b> |
|---------------------------------------------|---------------|----------------|
| <i>a</i> (Å)                                | 10.014        | 13.070         |
| <i>b</i> (Å)                                | 10.014        | 12.951         |
| <i>W</i> <sub>ad</sub> (J m <sup>-2</sup> ) | 0.82          | 0.63           |
| <i>Contact angle</i> (°)                    | 38            | 68             |

## References

1. Y. Li, X. Chen, A. Dolocan, Z. Cui, S. Xin, L. Xue, H. Xu, K. Park and J. B. Goodenough, *J Am Chem Soc*, 2018, **140**, 6448-6455.
2. K. Fu, Y. Gong, B. Liu, Y. Zhu, S. Xu, Y. Yao, W. Luo, C. Wang, S. D. Lacey, J. Dai, Y. Chen, Y. Mo, E. Wachsman and L. Hu, *SCIENCE ADVANCES*, 2017, **3**, 2017;2013: e1601659.
3. Y. Shao, H. Wang, Z. Gong, D. Wang, B. Zheng, J. Zhu, Y. Lu, Y.-S. Hu, X. Guo, H. Li, X. Huang, Y. Yang, C.-W. Nan and L. Chen, *ACS Energy Letters*, 2018, **3**, 1212-1218.
4. W. Feng, X. Dong, P. Li, Y. Wang and Y. Xia, *Journal of Power Sources*, 2019, **419**, 91-98.
5. X. Han, Y. Gong, K. K. Fu, X. He, G. T. Hitz, J. Dai, A. Pearse, B. Liu, H. Wang, G. Rubloff, Y. Mo, V. Thangadurai, E. D. Wachsman and L. Hu, *Nat Mater*, 2017, **16**, 572-579.
6. Y. Chen, M. He, N. Zhao, J. Fu, H. Huo, T. Zhang, Y. Li, F. Xu and X. Guo, *Journal of Power Sources*, 2019, **420**, 15-21.
7. J. Fu, P. Yu, N. Zhang, G. Ren, S. Zheng, W. Huang, X. Long, H. Li and X. Liu, *Energy & Environmental Science*, 2019, **12**, 1404-1412.
8. H. Huo, Y. Chen, N. Zhao, X. Lin, J. Luo, X. Yang, Y. Liu, X. Guo and X. Sun, *Nano Energy*, 2019, **61**, 119-125.
9. Y. Zhang, J. Meng, K. Chen, Q. Wu, X. Wu and C. Li, *ACS Appl Mater Interfaces*, 2020, **12**, 33729-33739.
10. H. Huo, Y. Chen, R. Li, N. Zhao, J. Luo, J. G. Pereira da Silva, R. Mücke, P. Kaghazchi, X. Guo and X. Sun, *Energy & Environmental Science*, 2020, **13**, 127-134.
